# 1        **Associations between Diabetes Self-Management and Microvascular** 2        **Complications Among Patients Living in Rural Areas, in Kenya**

3        Authors: Rachael Ileri<sup>1,2</sup>, Gideon Kikvi<sup>1</sup>, Susan Mambo<sup>1</sup>, Besty Cheriro<sup>1</sup>

4        <sup>1</sup>School of Public Health; Jomo Kenyatta University of Agriculture and  
5        Technology

6        <sup>2</sup>Department of Clinical Medicine; Kenya Medical Training College

7        **Introduction:** Diabetes is a major public health concern worldwide. Low and middle-  
8        income countries are the most affected. Diabetes self-management can significantly  
9        reduce the burden of diabetes complications and mortality.

10       **Methods:** This cross-sectional study was conducted at the outpatient department of a  
11       county referral hospital in Kenya, from 1st August 2022 to 30th October 2022. Patients  
12       with known type II diabetes of age  $\geq 20$  years visiting the hospital for routine follow-up  
13       visits were included. A 7-item Summary of Diabetes Self-care Activities (SDSAC)  
14       Questionnaire was used to assess Diabetes self-care activities. For data entry and  
15       statistical analysis, SPSS for Windows version 27.0 was used.

16       **Results:** There were 96 (39.2%) males and 149 (60.8%) females. Most of the  
17       participants were more than 61 years 148 (60.4%). Prevalence of Diabetes microvascular  
18       complications among the study participants was 56.78%, 25.3%, and 14.7% for  
19       neuropathy, retinopathy, and nephropathy respectively. significant association was  
20       found between the sum scale scores of dietary activities, blood glucose testing, physical  
21       activity, foot care, and neuropathy at 95% CI and ( $P < 0.001$ ). Scores on the Blood  
22       glucose testing and foot care activities subscale were significantly associated with

23 Retinopathy ( $p < 0.001$ ). Additionally, significant associations were found between the  
24 presence of nephropathy and dietary activities, foot care, and physical activity subscale  
25 ( $p = < 0.001$ ).

26 **Conclusions:** Diabetes self-management activities have an impact on microvascular  
27 complications in patients with diabetes.

28 **Keywords:** self-management activities, diabetes, Microvascular complications,  
29 Summary of diabetes self-care activities.

## 30 **Introduction**

31 Diabetes is a major public health concern that is approaching epidemic proportions  
32 worldwide(1). Levels of morbidity and mortality attributable to diabetes remain high.  
33 Though diabetes and its related complications is a global problem low and middle-  
34 income countries (LMICs) are the most affected(2). Diabetes treatment imposes a huge  
35 economic burden in developing countries and the costs are projected to rise further(3).  
36 Among the chronic complications of diabetes, microvascular complications of kidney,  
37 retina, and peripheral nerves are a significant cause of mortality and disability in  
38 patients with diabetes. This greatly affects their quality of life and care burden. the  
39 Diabetes self-management can reduce complications and mortality in patients living  
40 with diabetes(4).

41 Unlike previously believed that it is more of a problem of cities and towns, the rural  
42 communities have experienced an increase as well(3). The responsibility of providing  
43 preventive and therapeutic healthcare services falls on the healthcare workers in the  
44 primary health centers and dispensaries as there are not many private or tertiary-level

45 hospitals to care for the health demands of diabetic patients(5). The situation is worse  
46 because these communities are faced with multiple challenges, including a lack of access  
47 to diabetes education, clinical services, limited smart cellphone coverage, and internet  
48 access, limited transportation and long travel distances, as well as higher rates of  
49 poverty(6).

50 The needs of diabetic patients are not only limited to adequate glycemic control but also  
51 prevent complications and disability(7). One of the biggest challenges for healthcare  
52 providers is addressing the continued needs and demands of individuals with  
53 diabetes(8). The regular follow-up of diabetic patients by a multidisciplinary team is  
54 vital in averting long-term complications(9,10). This is met with difficulties as more  
55 than 80% of consultants in Kenya are found in Urban areas and tertiary hospitals, this  
56 in turn contributes to suboptimal diabetes management and higher rates of diabetes-  
57 related complications(11).

## 58 **Diabetes Self-Management Activities**

59 Self-care in diabetes is a process of development of knowledge or awareness by learning  
60 to survive with the complex nature of diabetes in a social context(12). The majority of  
61 daily diabetes care is handled by patients and/or families. Seven essential self-care  
62 behaviors in people with diabetes predict outcomes. They include; healthy eating, being  
63 physically active, monitoring of blood sugar, compliance with medications, good  
64 problem-solving skills, healthy coping skills, and risk-reduction behaviors(13–16). These  
65 measures can be useful for both clinicians and educators treating individual patients  
66 and for researchers evaluating new approaches to care(17). Self-report is an important  
67 practical and cost-effective approach for self-management assessment(18).

68 Diabetes self-management activities are behaviors undertaken by people with diabetes  
69 to successfully manage the disease on their own. All seven behaviors are positively  
70 correlated with good glycemic control, reduction of complications, and improvement in  
71 quality of life(9,19,20). In addition, it was observed that self-care encompasses not only  
72 performing these activities but also the interrelationships between them. Diabetes self-  
73 care requires the patient to make major lifestyle modifications enhanced with the  
74 supportive role of healthcare staff for maintaining a higher level of self-confidence  
75 leading to a successful behavior change(21–24).

76 Diabetes education is important but it must be transferred to action or self-care  
77 activities to fully benefit the patient. The American Association of Clinical  
78 Endocrinologists and WHO emphasize the importance of patients becoming active and  
79 knowledgeable participants in their care(10,25). Emphasis should be placed on;  
80 understanding the disease and the role of drugs, diet plans, foot, and eye care, role of  
81 continuous and sustained lifestyle modification, physical activities, and self-glucose  
82 monitoring(26).

83 Given the prevalence of DM and its complications in Nyeri county, there had been  
84 limited studies conducted to determine diabetes self-management among its  
85 population. Therefore, study aimed to assess the diabetes self-management practices  
86 among diabetes patients living in rural areas in Nyeri county, Kenya.

## 87 **Materials and Methods**

88 A facility-based, cross-sectional study was conducted at the outpatient department of  
89 Nyeri County referral hospital in Kenya. The study duration was from 1st August 2022

90 till 30th October 2022. In this study, patients of both genders, of age 20 years and  
91 above, known cases of type II DM visiting the hospital for routine follow-up visit were  
92 included. Patients being seen in the emergency or in-patient department, patients who  
93 did not have at least one available record of HbA1c from the last six months were  
94 excluded. All patients were included after attaining informed consent. A semi-structured  
95 questionnaire was used to record patient information. It included biodata information,  
96 Duration of DM and treatment and HbA1c record from the last six months.

97 In order to assess their status of self-care, Summary of Diabetes self-care activities  
98 (SDSCA) Questionnaire was used. The seven items of SDSCA are used to assess self-care  
99 activities. They are divided into 7 subscales – blood glucose testing subscale (item  
100 7,8,3A), Diet sub scale (item 1,2,3,4,1A,5A), Physical exercise subscale (item 5,6, 2A),  
101 smoking subscale (item 11,12A,13A, 14A), foot care subscale (item 9,10,9A,10A,11A),  
102 medications subscale (item 6A,7A,8A) and self-care recommendations subscale (item  
103 1A,2A,3A,4A). The questionnaire ask patient about their diabetes self-care activities  
104 during the past 7 days. If they were sick during the past 7 days, we went back to the last  
105 7 days that they were not sick.

106 Scoring instructions were. Step 1: For items 1–10, use the number of days per week on a  
107 scale of 0–7. Step 2: Scoring Scales; General Diet = Mean number of days for items 1  
108 and 2 and Specific Diet = Mean number of days for items 3, and 4 where the scale was  
109 (0=7, 1=6, 2=5, 3=4, 4=3, 5=2, 6=1,7=0); Exercise = Mean number of days for items 5  
110 and 6; Blood-Glucose Testing = Mean number of days for items 7 and 8. Foot-Care =  
111 Mean number of days for items 9 and 10; Smoking Status = Item 11 (0 = nonsmoker,1 =  
112 smoker), and number of cigarettes smoked per day.

113 Scoring for Additional Items such as; Recommended regimen = Items 1A - 4A, and  
114 items 12A - 14A, no scoring required; Diet = Use total number of days for item 5A;  
115 Medications = Use item 6A - OR - 7A AND 8A, use total number of days for item 6A, use  
116 mean number of days if both 7A and 8A are applicable. Lastly; Foot-Care = Mean  
117 number of days for items 9A - 11A, after reversing 10A and including items 9 and 10.

118 For data entry and statistical analysis SPSS for Windows version 27 was utilized. Patient  
119 characteristics were presented as frequency and percentages and compared using Chi  
120 square test. For SDSCA overall and its subscales mean and standard deviation (SD) were  
121 calculated and for comparison independent sample t-test was applied. The p value  
122  $\leq 0.05$  was taken as significant.

## 123 **Ethics statement**

124 Both written and verbal informed consent for participation was also obtained from all  
125 the participants. For written consent all participants signed the consent form in the  
126 questionnaire. Verbal consent was witnessed by the nurse or clinical officer in-charge of  
127 the clinic. The study was approved by the Ethical Review Committee of Jomo Kenyatta  
128 University of Agriculture and Technology, and the National Commission for Science,  
129 Technology and Innovation (NACOSTI/P/22/18990)

## 130 **Results**

131 **Participants characteristics, both overall and according to the presence of**  
132 **the microvascular complications of diabetes**

133 Two hundred and forty-five people with Diabetes (PWD) participated in the study.  
 134 Among them, 96 (39.2%) were males and 149 (60.8%) were females. Most of the  
 135 participants were more than 61 years 148 (60.4%). Prevalence of Diabetes microvascular  
 136 complications among the study participants were 56.78%, 25.3% and 14.7% for  
 137 neuropathy, retinopathy and nephropathy respectively. Significant association was  
 138 found between age and level of education with all the three microvascular  
 139 complications. Furthermore, marital status was associated nephropathy and neuropathy  
 140 whereas Hb1Ac was associated with nephropathy (Table 1).

| Table 1: Participants socio-demographic characteristics association with the presence of the microvascular complications of diabetes |               |                            |         |                            |         |                            |         |
|--------------------------------------------------------------------------------------------------------------------------------------|---------------|----------------------------|---------|----------------------------|---------|----------------------------|---------|
| Characteristic variable                                                                                                              | Total (n=245) | Neuropathy (n= 139; 56.7%) | P value | Retinopathy (n= 62; 25.3%) | P value | Nephropathy (n= 36 ;14.7%) | P value |
| <b>Age</b>                                                                                                                           |               |                            |         |                            |         |                            |         |
| 20-35                                                                                                                                | 12 (4.9%)     | 1(0.7)                     | 0.001   | 0 (0%)                     | 0.009   | 2(5.6%)                    | 0.02    |
| 36-45                                                                                                                                | 21 (8.6%)     | 7(5.0%)                    |         | 3(4.8%)                    |         | 1(2.8%)                    |         |
| 46-60                                                                                                                                | 64 (26.1%)    | 27(19.4)                   |         | 11(17.7%)                  |         | 3(8.3%)                    |         |
| 61 and above                                                                                                                         | 148 (60.4%)   | 104(74.8)                  |         | 48(77.4%)                  |         | 30(83.3%)                  |         |
| <b>Sex</b>                                                                                                                           |               |                            |         |                            |         |                            |         |
| Male                                                                                                                                 | 96 (39.2%)    | 51 (36.7%)                 | 0.36    | 19 (30.6%)                 | 0.11    | 14 (38.9%)                 | 0.97    |
| Female                                                                                                                               | 149 (60.8%)   | 88 (63.3%)                 |         | 43 (69.4%)                 |         | 22 (61.1%)                 |         |
| <b>Marital status</b>                                                                                                                |               |                            |         |                            |         |                            |         |
| Single                                                                                                                               | 23 (9.4%)     | 7 (5.0%)                   | 0.003   | 3 (4.8%)                   | 0.08    | 2 (5.6%)                   | 0.007   |
| Married                                                                                                                              | 168 (68.6%)   | 93 (66.9%)                 |         | 39 (62.9%)                 |         | 20 (55.6%)                 |         |
| Divorced/Separated                                                                                                                   | 8 (3.8%)      | 4 (2.9%)                   |         | 2 (3.2%)                   |         | 0 (0%)                     |         |
| Widowed                                                                                                                              | 46 (18.8%)    | 35 (25.2%)                 |         | 18 (29.0%)                 |         | 14 (38.9%)                 |         |
| <b>Level of Education</b>                                                                                                            |               |                            |         |                            |         |                            |         |
| Primary                                                                                                                              | 140 (57.1%)   | 83 (59.7%)                 | 0.003   | 39 (62.9%)                 | 0.003   | 19 (52.8%)                 | 0.008   |
| Secondary                                                                                                                            | 64 (26.1%)    | 28 (20.1%)                 |         | 7 (11.3%)                  |         | 6 (16.7%)                  |         |
| Tertiary                                                                                                                             | 13 (5.3%)     | 5 (3.6%)                   |         | 3 (4.8%)                   |         | 1 (2.8%)                   |         |

|                                                                  |                |             |      |            |      |            |      |
|------------------------------------------------------------------|----------------|-------------|------|------------|------|------------|------|
| No schooling                                                     | 28<br>(11.4%)  | 23 (16.1%)  |      | 13 (21.0%) |      | 10 (27.8%) |      |
| <b>Occupation</b>                                                |                |             |      |            |      |            |      |
| Office job                                                       | 9 (3.7%)       | 3 (2.2%)    | 0.17 | 3 (4.8%)   | 0.13 | 0 (0%)     | 0.06 |
| Outdoor job                                                      | 30<br>(12.2%)  | 13 (19.4%)  |      | 4 (6.5%)   |      | 5 (13.9%)  |      |
| Farmer                                                           | 175<br>(71.4%) | 104 (74.8%) |      | 43 (69.4%) |      | 22 (61.1%) |      |
| Stay at home                                                     | 31<br>(12.7%)  | 19 (13.7%)  |      | 12 (19.4%) |      | 9 (25.0%)  |      |
| <b>Duration of diabetes</b>                                      |                |             |      |            |      |            |      |
| Below 5 years                                                    | 76<br>(31.0%)  | 35 (25.2%)  | 0.05 | 19 (30.6%) | 0.26 | 8 (22.2%)  | 0.44 |
| 5-10 years                                                       | 89<br>(36.3%)  | 52 (37.4%)  |      | 18 (29.1%) |      | 14 (38.9%) |      |
| More than 10 years                                               | 80<br>(32.7%)  | 52 (37.4%)  |      | 25 (40.3%) |      | 14 (38.9%) |      |
| <b>Diabetes treatment regimen</b>                                |                |             |      |            |      |            |      |
| Oral Hypoglycemics                                               | 165<br>(67.3%) | 96 (69.1%)  | 0.73 | 41 (66.1%) | 0.90 | 21 (58.3%) | 0.27 |
| Insulin                                                          | 24<br>(9.8%)   | 12 (8.6%)   |      | 7 (11.3%)  |      | 6 (16.7%)  |      |
| Insulin plus oral hypoglycemics                                  | 56<br>(22.9%)  | 31 (22.3%)  |      | 14 (22.6%) |      | 9 (25.0%)  |      |
| <b>Hb1aC level</b>                                               |                |             |      |            |      |            |      |
| Good control                                                     | 101<br>(41.2%) | 56 (40.3%)  | 0.73 | 21 (33.9%) | 0.17 | 8 (22.2%)  | 0.01 |
| Poor Control                                                     | 144<br>(58.8%) | 83 (59.7%)  |      | 41 (66.1%) |      | 28 (77.8%) |      |
| Values are presented as number (%) and P value for associations. |                |             |      |            |      |            |      |

141

142 **Associations between Summary of diabetes self-care activities and the**  
 143 **microvascular complications of diabetes**

144 As shown in Table 2, a significant association was found between the sum scale scores of  
 145 dietary activities, blood glucose testing, physical activity, foot care and neuropathy at  
 146 95% CI and ( $P < 0.001$ ). Scores on the Blood glucose testing and foot care activities  
 147 subscale were significantly associated with Retinopathy ( $p < 0.001$ ). Additionally,  
 148 significant associations were found between the presence of nephropathy and dietary  
 149 activities, foot care and physical activity subscale ( $p < 0.001$ ) (Table 2).



**Table: 2 Associations between Summary of diabetes self-care activities and the microvascular complications of diabetes**

| SDSAC Variable           | Total (n=245) mean and SD | Neuropathy OR (95% CI) | P value | Retinopathy OR (95% CI) | P value | Nephropathy OR (95% CI) | P value |
|--------------------------|---------------------------|------------------------|---------|-------------------------|---------|-------------------------|---------|
| Dietary Practice         | 4.44 ±1.51                | 0.07 (0.03,0.11)       | <0.001* | 0.04 (-0.001,0.07)      | 0.06    | 0.06 (0.03,0.08)        | <0.001* |
| Blood glucose monitoring | 1.52 ±2.15                | 0.06 (0.03,0.09)       | <0.001* | 0.03 (0.02,0.07)        | <0.001* | -0.003 (-0.02,0.02)     | 0.76    |
| Physical Activity        | 2.39 ±1.86                | 0.06 (0.03,0.09)       | <0.001* | 0.03 (0.003,0.06)       | 0.08    | 0.05 (0.03,0.08)        | <0.001* |
| Foot care                | 4.99 ±1.63                | 0.08 (0.02,0.09)       | <0.001* | 0.06 (0.02,0.09)        | <0.001* | 0.06(0.03,0.08)         | <0.001* |
| DM Medication Adherence  | 7.28± 1.55                | -0.02(-0.07,0.02)      | 0.29    | 0.01 (-0.03,0.05)       | 0.55    | 0.007 (0.02,0.04)       | 0.62    |

SD, standard deviation; OR, odds ratio; CI, confidence interval.  
\*p<0.05.

150

151

## Discussion

152 In this study, we sought to assess associations between diabetes self-care activities and  
 153 the microvascular complications of diabetes in patients with diabetes living in rural  
 154 area. In our study, Prevalence of Diabetes microvascular complications among the  
 155 study participants were 56.78%, 25.3% and 14.7% for neuropathy, retinopathy and  
 156 nephropathy respectively. The proportion is higher as compared to other  
 157 studies(27,28). This study mainly focused on participants living in the rural area unlike  
 158 other studies. This difference could be because rural populations with diabetes  
 159 experience unique challenges and substantial inequities in the achievement of diabetes  
 160 care(29).

161 In the present study, participants were further categorized into strata according to their  
 162 various demographic characteristics. It was observed that patients who were older than

163 sixty-one years were more likely to have Neuropathy, Retinopathy compared to those  
164 who were younger ( $p < 0.05$ ). This finding is consistent with other studies that have  
165 shown age is an important factor that affects the increased risk of prediabetes and  
166 diabetes (30). Additionally, microvascular events occur more commonly in populations  
167 with diabetes and the risk of these events are predominantly related to duration of  
168 diabetes(31).

169 Level of education was associated with all the MVCs. This study agrees with other  
170 studies that have revealed educational status influences the awareness about diabetes  
171 self-care, compliance to drugs and the health seeking behavior of an individual (32).  
172 Studies have observed that lower the education higher is the risk of developing diabetes  
173 complications(33).

174 In the present study, it was observed that dietary practices and physical activity was  
175 significantly associated neuropathy and nephropathy complications. This can be  
176 explained by a consistent healthy dietary pattern is associated with a reduced risk of  
177 microvascular complications in patients with diabetes. In this study we also assessed  
178 carbohydrate spacing and fats intake; studies have shown that high carbohydrate and  
179 high monounsaturated fat diets improve insulin sensitivity (34–36). These findings  
180 provide a reasonable basis for dietary recommendations aimed at preventing diabetic  
181 microvascular complications.

182 Physical activity such as walking, gardening, leisure activity, exercise, or movement for  
183 transportation or an occupation among other aerobic and resistance exercise are known  
184 to improve insulin sensitivity. Additionally, it improves the lipid profile, BMI and blood

185 pressure. This study is consistent with other study findings that have reported that;  
186 physical activity improves glycemic control and better disease control(37–39).

187 Foot care practices was significantly associated with all the three microvascular  
188 complications. Others studies have demonstrated that patients with peripheral  
189 neuropathy presented with significantly higher rates of development of DR,  
190 macroalbuminuria and the existence of macrovascular complications (40–42). The  
191 results suggest that neuropathy, nephropathy and retinopathy are signs of a generalized  
192 diabetic microangiopathic process whose progression may be influenced by factors other  
193 than diabetes duration and metabolic and therefore when a patient takes measures to  
194 prevent one micro vascular complication it has direct impact to prevent of the similar  
195 complications (43,44).

196 The findings of association between blood glucose testing and neuropathy and  
197 retinopathy in this study are in agreement with previous literature. Blood glucose  
198 monitoring is an essential part of management in patients with diabetes mellitus (45).  
199 It helps to identify patterns in the fluctuation of blood glucose levels that occur in  
200 response to diet, exercise, medications, and pathological processes. It enhances early  
201 intervention in case of hypoglycemia or hyperglycemia which impacts on various body  
202 system such as the retina and neurons (46,47). It supports improvement of patient  
203 outcomes because critical decision can be made in time.

## 204 **Study Limitations**

205 This study is a cross-sectional study hence cannot establish causal inferences but rather  
206 associations. Nonetheless, this study provides the extent of association between diabetes  
207 self-management and MVCs to inform development of interventions.

## 208 **Conclusion**

209 The present study indicates that the diabetes-related self-care activities was directly  
210 linked with diabetes microvascular complications. Foot care, dietary practices, physical  
211 activity, blood glucose testing, Age, marital status, Hb1Ac and level of education were  
212 significantly associated with MVCs among patients. It is essential to promote Diabetes  
213 self-care education related to DM as a strategy to improve self-management and  
214 improve the overall patient outcome.

## 215 **Acknowledgments**

216 Gratitude goes to workers at Diabetic Clinic and authorities of Nyeri county Referral  
217 Hospital for their great support during the study.

## 218 **Financial obligation**

219 No funding was obtained for this research.

## 220 **Conflict of Interest**

221 None to Declare

## 222 **Authors' contributions**

223 Rachael Ileri contributed to the conception of the research idea, design data analysis  
224 and interpretation, paper drafting and revision. Gideon Kikvi contributed to the

225 conception of the research idea, design and revision of the final draft. Susan Mambo  
226 contributed to the conception of the research idea, design, and revision of final draft.  
227 Besty Cheriro contributed to the conception of the research idea, design, and revision of  
228 final draft. All authors approved the final manuscript before publication and agree to be  
229 accountable for all aspects of the work.

## 230 REFERENCES

- 231 1. Mathur P, Leburu S, Kulothungan V. Prevalence, Awareness, Treatment and  
232 Control of Diabetes in India From the Countrywide National NCD Monitoring  
233 Survey. *Front Public Heal.* 2022 Mar 14;10.
- 234 2. Sun H, Saeedi P, Karuranga S, Pinkepank M, Ogurtsova K, Duncan BB, et al. IDF  
235 Diabetes Atlas: Global, regional and country-level diabetes prevalence estimates  
236 for 2021 and projections for 2045. *Diabetes Res Clin Pract.* 2022 Jan 1;183.
- 237 3. Marsh Z, Teegala Y, Cotter V. Improving diabetes care of community-dwelling  
238 underserved older adults. *J Am Assoc Nurse Pract.* 2022 Oct 7;34(10):1156–66.
- 239 4. Tang J, Wu T, Hu X, Gao L. Self-care activities among patients with type 2  
240 diabetes mellitus: A cross-sectional study. *Int J Nurs Pract.* 2021 Dec 1;27(6).
- 241 5. Alanazi M. Determinants of successful diabetes self-management behaviors  
242 among women of Arab descent with Type 2 Diabetes. *Prim Care Diabetes.* 2021  
243 Apr 1;15(2):306–13.
- 244 6. Ary D V., Toobert D, Wilson W, Glasgow RE. Patient perspective on factors  
245 contributing to nonadherence to diabetes regimen. *Diabetes Care.* 1986;9(2):168–

- 246 72.
- 247 7. Shrivastava SRBL, Shrivastava PS, Ramasamy J. Role of self-care in management  
248 of diabetes mellitus. *J Diabetes Metab Disord*. 2013 Mar 5;12(1).
- 249 8. Lin K, Yang X, Yin G, Lin S. Diabetes Self-Care Activities and Health-Related  
250 Quality-of-Life of individuals with Type 1 Diabetes Mellitus in Shantou, China. *J*  
251 *Int Med Res*. 2016 Feb 1;44(1):147–56.
- 252 9. Aquino JA, Baldoni NR, Flôr CR, Sanches C, Di Lorenzo Oliveira C, Alves GCS, et  
253 al. Effectiveness of individual strategies for the empowerment of patients with  
254 diabetes mellitus: A systematic review with meta-analysis. *Prim Care Diabetes*.  
255 2018 Apr 1;12(2):97–110.
- 256 10. Aronson R, Brown RE, Jiandani D, Walker A, Orzech N, Mbuagbaw L. Assessment  
257 of self-management in patients with diabetes using the novel LMC Skills,  
258 Confidence and Preparedness Index (SCPI). *Diabetes Res Clin Pract*. 2018 Mar  
259 1;137:128–36.
- 260 11. Afaya RA, Bam V, Lomotey AY, Afaya A. Clinical factors influencing knowledge  
261 and self-care practice among adults with type 2 diabetes mellitus. *Nurs Open*.  
262 2023 Apr 1;10(4):2492–500.
- 263 12. Khosravizadeh O, Ahadinezhad B, Maleki A, Yousefy S, Momeni Z. Diabetes self-  
264 care activities among patients with type 2 diabetes: A systematic review and meta-  
265 analysis. *Int J Diabetes Dev Ctries*. 2023;
- 266 13. Eva JJ, Kassab YW, Neoh CF, Ming LC, Wong YY, Hameed MA, et al. Self-care

- 267 and self-management among adolescent T2DM patients: A review. *Front*  
268 *Endocrinol (Lausanne)*. 2018 Oct 18;9(OCT).
- 269 14. Maina PM, Pienaar M, Reid M. Self-management practices for preventing  
270 complications of type II diabetes mellitus in low and middle-income countries: A  
271 scoping review. *Int J Nurs Stud Adv*. 2023 Dec 1;5.
- 272 15. Young-Hyman D, De Groot M, Hill-Briggs F, Gonzalez JS, Hood K, Peyrot M.  
273 Psychosocial care for people with diabetes: A position statement of the American  
274 diabetes association. *Diabetes Care*. 2016;39(12):2126–40.
- 275 16. Toobert DJ, Hampson SE, Glasgow RE. The summary of diabetes self-care  
276 activities measure: Results from 7 studies and a revised scale. *Diabetes Care*.  
277 2000;23(7):943–50.
- 278 17. Llera-Fábregas A, Pérez-Ríos N, Camacho-Monclova DM, Ramirez-Vick M,  
279 Andriankaja OM. Diabetes self-care activities and perception and glycemic control  
280 in adult Puerto Rican residents with Type 2 Diabetes: The LLIPDS Study. *J Public*  
281 *health Res*. 2022 Oct 1;11(4).
- 282 18. Lee J, Lee EH, Chae D, Kim CJ. Patient-reported outcome measures for diabetes  
283 self-care: A systematic review of measurement properties. *Int J Nurs Stud*. 2020  
284 May 1;105.
- 285 19. Chew BH, Vos RC, Pouwer F, Rutten GEHM. The associations between diabetes  
286 distress and self-efficacy, medication adherence, self-care activities and disease  
287 control depend on the way diabetes distress is measured: Comparing the DDS-17,  
288 DDS-2 and the PAID-5. *Diabetes Res Clin Pract*. 2018 Aug 1;142:74–84.

- 289 20. Pintaudi B, Lucisano G, Gentile S, Bulotta A, Skovlund SE, Vespasiani G, et al.  
290 Correlates of diabetes-related distress in type 2 diabetes: Findings from the  
291 benchmarking network for clinical and humanistic outcomes in diabetes  
292 (BENCH-D) study. *J Psychosom Res.* 2015;79(5):348–54.
- 293 21. Kim S, Love F, Quistberg DA, Shea JA. Association of health literacy with self-  
294 management behavior in patients with diabetes. *Diabetes Care.* 2004  
295 Dec;27(12):2980–2.
- 296 22. Bloomgarden Z, Gouller A. Prevention of Microvascular Complications of  
297 Diabetes. *Princ Diabetes Mellit.* 2004;619–38.
- 298 23. Salmerón J, Hu FB, Manson JE, Stampfer MJ, Colditz GA, Rimm EB, et al.  
299 Dietary fat intake and risk of type 2 diabetes in women. *Am J Clin Nutr.*  
300 2001;73(6):1019–26.
- 301 24. Marshall JA, Bessesen DH. Dietary fat and the development of type 2 diabetes.  
302 *Diabetes Care.* 2002;25(3):620–2.
- 303 25. Glasgow RE, Osteen VL. Evaluating diabetes education: Are we measuring the  
304 most important outcomes? *Diabetes Care.* 1992;15(10):1423–32.
- 305 26. Glasgow RE, Fisher EB, Anderson BJ, LaGreca A, Marrero D, Johnson SB, et al.  
306 Behavioral science in diabetes: Contributions and opportunities. *Diabetes Care.*  
307 1999 May;22(5):832–43.
- 308 27. Govindarajan Venguidesvarane A, Jasmine A, Varadarajan S, Shriraam V,  
309 Muthuthandavan AR, Durai V, et al. Prevalence of Vascular Complications Among



- 310 Type 2 Diabetic Patients in a Rural Health Center in South India. *J Prim Care*  
311 *Community Heal* [Internet]. 2020 [cited 2024 Jan 29];11. Available from:  
312 <https://doi.org/10.1177/2150132720959962>
- 313 28. Pelluri R, Srikanth K, Chimakurthy J, Nagasubramanian VR. Microvascular  
314 Complications and Their Associated Risk Factors Among Rural Type 2 Diabetic  
315 Population: A Cross-Sectional Study. *SN Compr Clin Med* 2021 32 [Internet].  
316 2021 Feb 5 [cited 2024 Jan 29];3(2):625–31. Available from:  
317 <https://link.springer.com/article/10.1007/s42399-021-00786-7>
- 318 29. Flood D, Geldsetzer P, Agoudavi K, Aryal KK, Campos L, Brant C, et al. Rural-  
319 Urban Differences in Diabetes Care and Control in 42 Low-and Middle-Income  
320 Countries: A Cross-sectional Study of Nationally Representative Individual-Level  
321 Data. *Diabetes Care* [Internet]. 2022 [cited 2024 Jan 29];45. Available from:  
322 <https://doi.org/10.2337/dc21-2342>
- 323 30. Yan Z, Cai M, Han X, Chen Q, Lu H. The Interaction Between Age and Risk  
324 Factors for Diabetes and Prediabetes: A Community-Based Cross-Sectional Study.  
325 *Diabetes, Metab Syndr Obes* [Internet]. 2023 [cited 2024 Jan 30];16:85–93.  
326 Available from:  
327 <https://www.tandfonline.com/action/journalInformation?journalCode=dms020>
- 328 31. Singh Jaggi A, Parkash Singh V, Bali A, Singh N. Advanced Glycation End  
329 Products and Diabetic Complications. *Korean J Physiol Pharmacol* [Internet].  
330 2014 [cited 2024 Jan 30];18:1–14. Available from:  
331 <http://dx.doi.org/10.4196/kjpp.2014.18.1.1>

- 332 32. Chawla SPS, Kaur S, Bharti A, Garg R, Kaur M, Soin D, et al. Impact of health  
333 education on knowledge, attitude, practices and glycemc control in type 2  
334 diabetes mellitus. *J Fam Med Prim Care* [Internet]. 2019 [cited 2024 Jan  
335 30];8(1):261. Available from: [/pmc/articles/PMC6396605/](#)
- 336 33. Hwang Y, Lee D, Kim YS. Educational Needs Associated with the Level of  
337 Complication and Comparative Risk Perceptions in People with Type 2 Diabetes.  
338 *Osong Public Heal Res Perspect* [Internet]. 2020 Aug 1 [cited 2024 Jan  
339 30];11(4):170. Available from: [/pmc/articles/PMC7442446/](#)
- 340 34. Ghaemi F, Firouzabadi FD, Moosaie F, Shadnoush M, Poopak A, Kermanchi J, et  
341 al. Effects of a Mediterranean diet on the development of diabetic complications:  
342 A longitudinal study from the nationwide diabetes report of the National Program  
343 for Prevention and Control of Diabetes (NPPCD 2016-2020). *Maturitas*. 2021 Nov  
344 1;153:61–7.
- 345 35. Rydall AC, Rodin GM, Olmsted MP, Devenyi RG, Daneman D. Disordered Eating  
346 Behavior and Microvascular Complications in Young Women with Insulin-  
347 Dependent Diabetes Mellitus. *N Engl J Med*. 1997 Jun 26;336(26):1849–54.
- 348 36. Chudasama Y V., Khunti K. Healthy lifestyle choices and microvascular  
349 complications: New insights into diabetes management. *PLoS Med*. 2023 Jan  
350 1;20(1).
- 351 37. Zhu X, Zhang X, Zhou C, Li B, Huang Y, Li C, et al. Walking pace and  
352 microvascular complications among individuals with type 2 diabetes: A cohort  
353 study from the UK Biobank. *Scand J Med Sci Sport*. 2023 Jan 1;

- 354 38. Makura CBT, Nirantharakumar K, Girling AJ, Saravanan P, Narendran P. Effects  
355 of physical activity on the development and progression of microvascular  
356 complications in type 1 diabetes: Retrospective analysis of the DCCT study. *BMC*  
357 *Endocr Disord.* 2013 Oct 2;13.
- 358 39. Blomster JI, Chow CK, Zoungas S, Woodward M, Patel A, Poulter NR, et al. The  
359 influence of physical activity on vascular complications and mortality in patients  
360 with type 2 diabetes mellitus. *Diabetes, Obes Metab.* 2013;15(11):1008–12.
- 361 40. Vithian K, Hurel S. Microvascular complications: pathophysiology and  
362 management. *Clin Med (Northfield Il)* [Internet]. 2010 [cited 2024 Jan  
363 30];10(5):505. Available from: [/pmc/articles/PMC4952418/](https://pubmed.ncbi.nlm.nih.gov/2418495/)
- 364 41. Mansour A, Mousa M, Abdelmannan D, Tay G, Hassoun A, Alsafar H.  
365 Microvascular and macrovascular complications of type 2 diabetes mellitus:  
366 Exome wide association analyses. *Front Endocrinol (Lausanne).* 2023;14.
- 367 42. Tuomilehto J, Schwarz P, Lindström J. Long-term benefits from lifestyle  
368 interventions for type 2 diabetes prevention: Time to expand the efforts. *Diabetes*  
369 *Care.* 2011 May;34(SUPPL. 2).
- 370 43. Geng T, Zhu K, Lu Q, Wan Z, Chen X, Liu L, et al. Healthy lifestyle behaviors,  
371 mediating biomarkers, and risk of microvascular complications among individuals  
372 with type 2 diabetes: A cohort study. *PLoS Med.* 2023 Jan 1;20(1).
- 373 44. Zhang Y, Pan XF, Chen J, Xia L, Cao A, Zhang Y, et al. Combined lifestyle factors  
374 and risk of incident type 2 diabetes and prognosis among individuals with type 2  
375 diabetes: a systematic review and meta-analysis of prospective cohort studies.

- 376 Diabetologia. 2020 Jan 1;63(1):21–33.
- 377 45. Turner R. Intensive blood-glucose control with sulphonylureas or insulin  
378 compared with conventional treatment and risk of complications in patients with  
379 type 2 diabetes (UKPDS 33). Lancet. 1998 Sep 12;352(9131):837–53.
- 380 46. Dahl-Jørgensen K, Brinchmann-Hansen O, Hanssen KF, Sandvik L, Aagenæs.  
381 Rapid tightening of blood glucose control leads to transient deterioration of  
382 retinopathy in insulin dependent diabetes mellitus: The Oslo study. Br Med J  
383 (Clin Res Ed). 1985 Mar 16;290(6471):811–5.
- 384 47. Stratton IM, Adler AI, Neil HAW, Matthews DR, Manley SE, Cull CA, et al.  
385 Association of glycaemia with macrovascular and microvascular complications of  
386 type 2 diabetes (UKPDS 35): prospective observational study. BMJ Br Med J  
387 [Internet]. 2000 Aug 8 [cited 2024 Jan 30];321(7258):405. Available from:  
388 /pmc/articles/PMC27454/  
389
